# Supplementary material for: The regulation of ZCT1, a transcriptional repressor of monoterpenoid indole alkaloid biosynthetic genes in Catharanthus roseus
Source: PubMed Central journal article supplement (PMC6937483; doi:10.1002/pld3.193), 2019-12-31
Supplement: PLD3-3-e00193-s001.pdf [file PLD3-3-e00193-s001.pdf]

# Supplemental Materials

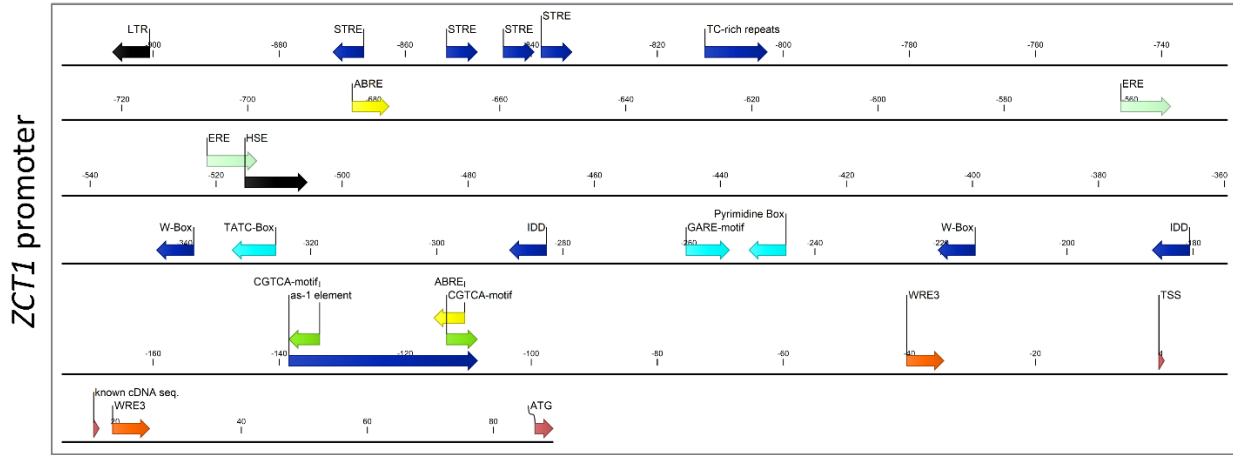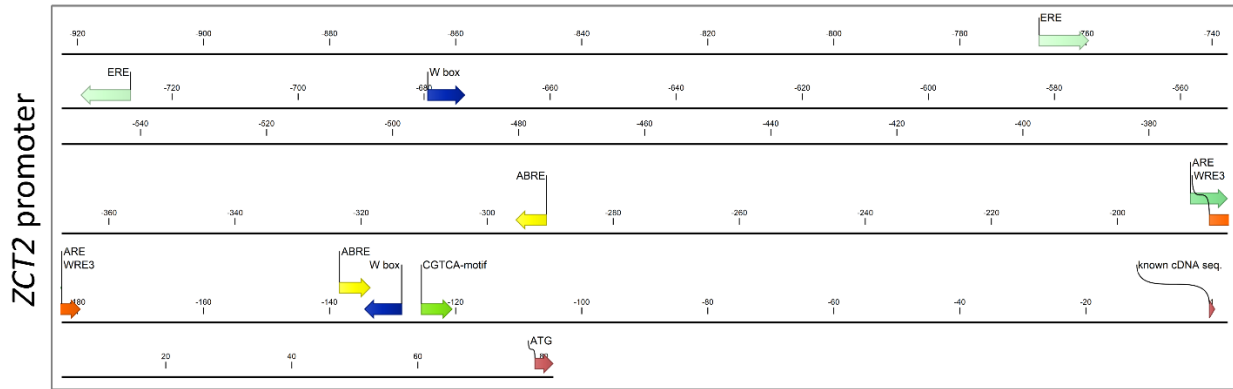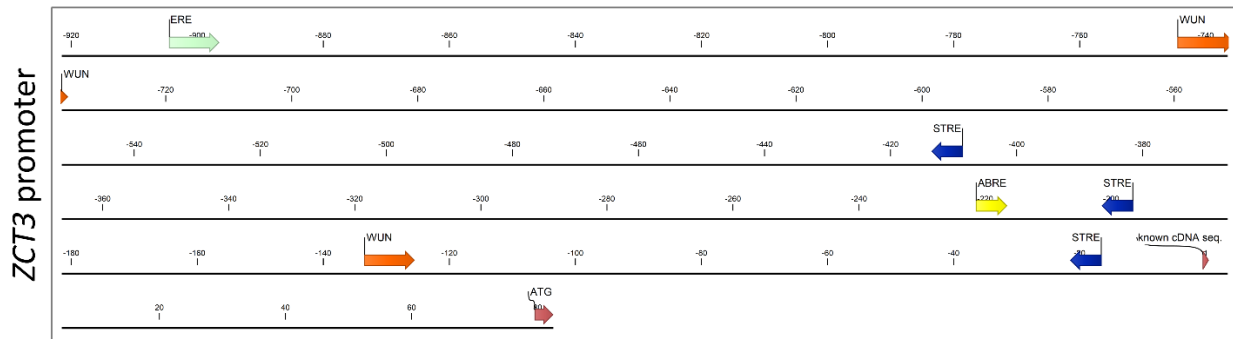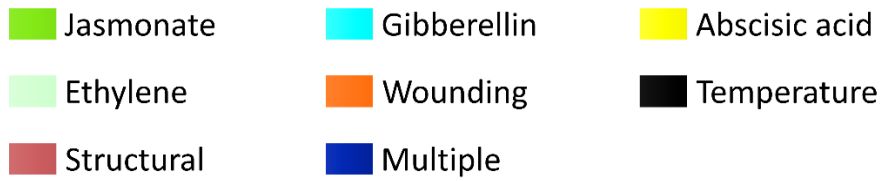

**Figure S1 Detailed *in silico* analysis of the *C. roseus* ZCT1, ZCT2, and ZCT3 promoters.**

Schematic illustrating putative hormone- and stress-responsive regulatory elements found in the promoters of *ZCT1*, *ZCT2*, and *ZCT3*. Analysis was limited to 1kb upstream of the start codon. Key promoter elements: Jasmonate (JA): CGTCA-motif; Gibberellin (GA): TATC-Box, gibberellin responsive element (GARE)-motif, and the pyrimidine box make up a GA responsive complex (GARC); Abscisic acid (ABA): abscisic acid responsiveness (ABRE); Ethylene: ethylene-responsive element (ERE); Wounding: wounding responsive element (WRE3 and WUN); Temperature: low-temperature responsiveness (LTR), heat stress responsiveness (HSE); Structural: transcriptional start site (TSS), known cDNA sequence, start codon (ATG); Multiple: stress response element (STRE), defense and stress responsiveness (TC-rich repeats), W-box respond to biotic and abiotic stress, IDD-binding sequence (IDD), an *as-1*-like element made up by two CGTCA-motifs in close proximity. Light responsive elements were excluded.

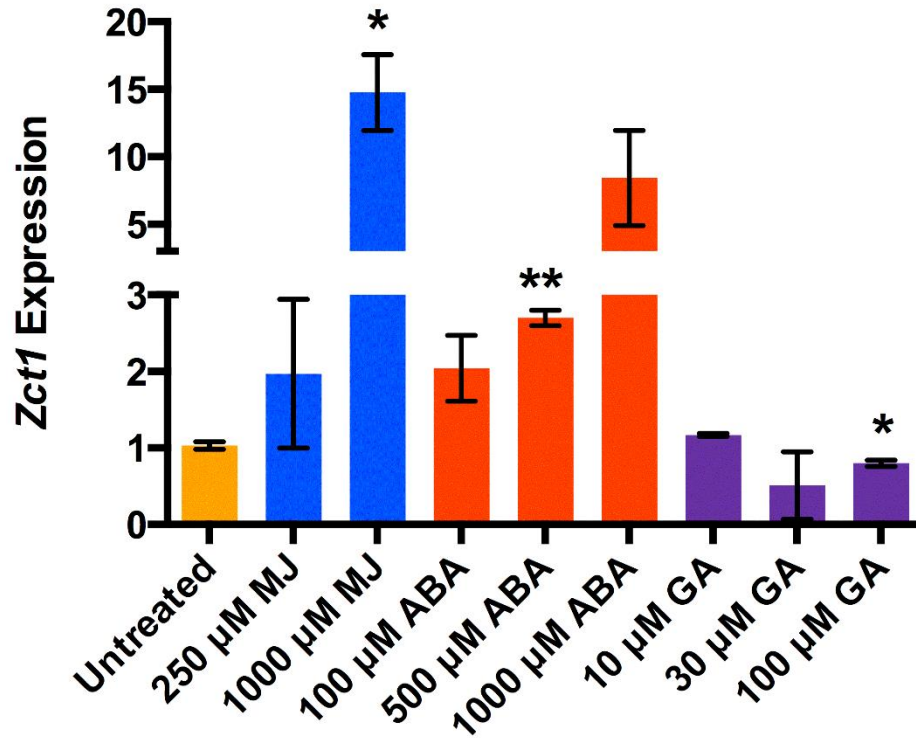

**Figure S2 *ZCT1* responds in hairy roots to MJ and ABA**

*ZCT1* expression level determined by qRT-PCR in a stable WT hairy root line treated as indicated for 7 h (n=2). Transcript levels were normalized to the housekeeping gene, *Rsp9*, and fold changes were calculated according to the  $2^{-\Delta\Delta Ct}$  method relative to the untreated condition (Livak & Schmittgen, 2001). The Student's t test was used to calculate statistical significance relative to the untreated samples. Error bars represent standard deviations and \* denotes  $p < 0.05$  and \*\* denotes  $p < 0.01$ .

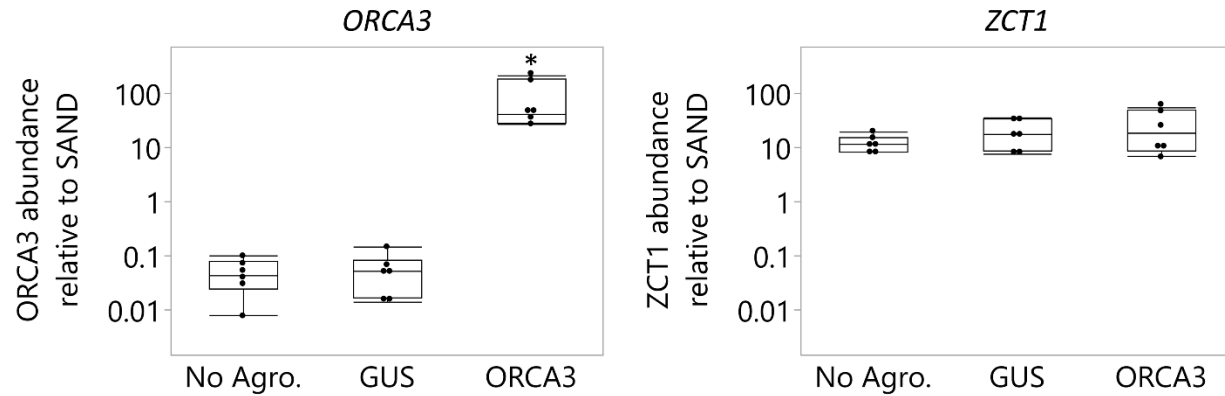

**Figure S3 *ZCT1* is highly expressed, while *ORCA3* is low expressed, in seedlings**

*C. roseus* seedlings were transiently transformed, as described in Mortensen *et al.*, 2019, with *A. tumefaciens* containing either a *GUS* (Addgene ID #123197) or *ORCA3* (Addgene ID #123196) overexpression construct (Figure S4). The “No Agro.” condition was treated identical to the other infiltrations but with no *Agrobacteria* present. Relative abundance of the gene of interest (GOI) is the  $2^{\text{Ct SAND}-\text{Ct GOI}}$ , with SAND as the reference gene. Data was analyzed using a one-way ANOVA and significant differences, compared to the *GUS* control, were determined using the Dunnett’s method. P-values <0.05 are indicated with one star (\*).

### Vector used for the creation of *pZCT1::GFP* hairy root lines

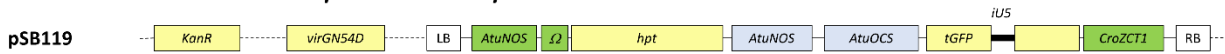

### Vectors used to study promoter deletions and 35S minimal promoter fusions

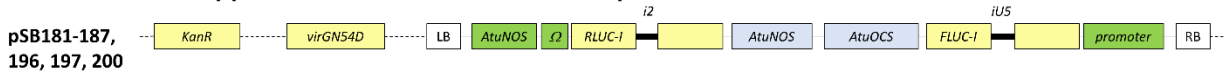

### Vectors used for transactivation experiments

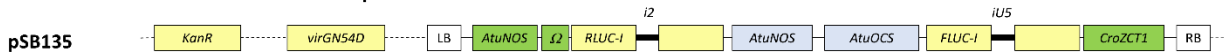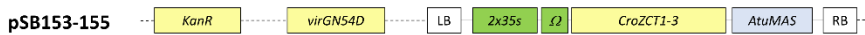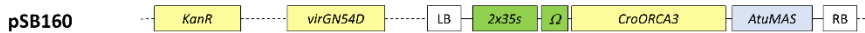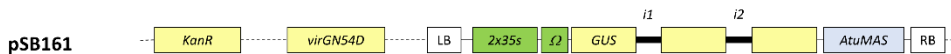

## Figure S4 Binary vectors used in this study

Promoters including 5'UTRs are shown in green, coding sequences in yellow, and terminators in blue. Introns are indicated with a black bar within the coding sequence. The vectors pSB153, pSB160 and pSB161 have been described previously (Mortensen et al., 2019). All other vectors were newly constructed in this study with parts from Weber *et al.*, 2011, Engler *et al.*, 2014, and Mortensen *et al.*, 2019 or with new parts described in this study. For the vector backbones pSB90 was used (Mortensen et al., 2019).

**Supplementary Table 1: Primers sequences (5'-3')**

| <b>Primers for amplifying ZCT1 Promoter with genome walking</b>                          |                                                 |
|------------------------------------------------------------------------------------------|-------------------------------------------------|
| ZCT1PGSP1*                                                                               | CAACGCCGGTACTGCTGATTTCTCCAT                     |
| ZCT1PGSP2*                                                                               | GCGGATTGTTCTTCTCTGAATCTCTCT                     |
| ZCT1PGSP3                                                                                | CAGCGGAAAACTAACATGC                             |
| ZCT1PGSP4                                                                                | CTACGCATAATATGTACCAGCCCAG                       |
| ZCT1P(-1961)                                                                             | TCGTTCCACTGAGCGTCAGACC                          |
| <b>Primers used for creating pDONR221-pZCT1 deletions</b>                                |                                                 |
| (deletions were first created in pDONOR before moving them into the MoClo system)        |                                                 |
| ZCT1P(-243)F                                                                             | GAGAAGGTTCCCTAGTTGAGGAAG                        |
| ZCT1P(-769)R                                                                             | CTACGCATAATATGTACCAGCCCAG                       |
| ZCT1P(-104)F                                                                             | CACCTCTCTCTCTGCTTTTCTC                          |
| ZCT1P(94)F                                                                               | GAAGAGATTTCAGAGAAGAACAATCCGC                    |
| ZCT1P(-162)R                                                                             | GAGTAAGGGAGGGAAGATAGAC                          |
| ZCT1P(-243)R                                                                             | CTTCCTCAACTAGGAACCTTCTC                         |
| <b>Primers used for cloning the ZCT1 promoter for pSB119, pSB135, pSB187</b>             |                                                 |
| Pzct1-1000_F                                                                             | ttgaagacaaGGAGTGTCTCATTTTTCGGAGTTTAGCTTGC       |
| Pzct1-1_R                                                                                | ttgaagacaaCATTGTTTTTTTTGTTATTGAATTGAACTTGCGAC   |
| <b>Primers used for cloning the ZCT2 coding sequence (pSB154)</b>                        |                                                 |
| ZCT2_mo_F1                                                                               | ttgaagacaaAATGGTGATGATTAATATACCGATGAAGC         |
| ZCT2_mo_R1                                                                               | ttgaagacaaCTCCTCATATGACCTCCGAGAGC               |
| ZCT2_mo_F2                                                                               | ttgaagacaaGGAGACATAGGGCGGCGATG                  |
| ZCT2_mo_R2                                                                               | ttgaagacaaAAGCTCATAAGAAGCAATCAACAGTTGG          |
| <b>Primers used for cloning the ZCT3 coding sequence (pSB155)</b>                        |                                                 |
| ZCT3_mo_F                                                                                | ttgaagacaaAATGGCACTTGAAGCTTTGAATTC              |
| ZCT3_mo_R                                                                                | ttgaagacaaAAGCCTAATTAATTTGATGGTTTTCACTTTGATC    |
| <b>Primers used for creating pZCT1 deletions in MoClo (pSB181-187)</b>                   |                                                 |
| ZCT1prom_R_MoClo                                                                         | ttgaagacaaCATTGTTTTTTTTGTTATTGAATTGAACTTGC      |
| Del1_F_MoClo                                                                             | ttgaagacaaGGAGGAGAAGGTTCCCTAGTTGAGGAAGAG        |
| Del2_F_MoClo                                                                             | ttgaagacaaGGAGCACCTCTCTCTCTGCTTTCTCTTTT         |
| Del4/5/mutAs-1_F_MoClo                                                                   | ttgaagacaaGGAGGATTACTGCGATTAATTAGGATATTACCTAATG |
| <b>Primers used for creating 35S minimal fusions in MoClo (pSB196, 197, 200)</b>         |                                                 |
| 35S_R_Bpil_mis                                                                           | TAAGGgaagacCCCATTGTATCG                         |
| primer151                                                                                | ttgaagacaaGGAGGCAAGACCCTTCCCTCTATATAAG          |
| primer153                                                                                | ttgaagacaaTACTGCAAGACCCTTCCCTCTATATAAG          |
| primer154                                                                                | ttgaagacaaGGAGTAGAGTAGTCAAATCTATGGGATAAAAAAG    |
| primer155                                                                                | ttgaagacaaAGTACCTTGTGTTGACTCTTCCCTCAAC          |
| primer156                                                                                | ttgaagacaaAGTAGATAGACAAGGATTCATAAGAAAGGC        |
| <b>Primers for transiently transformed seedlings and WT hairy roots qRT-PCR analysis</b> |                                                 |
| Rps9_F                                                                                   | TCCACCATGCCAGAGTGCTCATTA                        |
| Rps9_R                                                                                   | TCCATCACCACCAGATGCCTTCTT                        |
| SAND_qF                                                                                  | TGCTGTGGAGGAGGAAGAAG                            |
| SAND_qR                                                                                  | ACTGGCGGAACACTACTACTACC                         |

|               |                          |
|---------------|--------------------------|
| ZCT1_F        | AATCTTTAGCGGTGACGAAGCCGA |
| ZCT1_R        | CGTTGTCCTCAGGCGTCAAATTCA |
| Orca3-forward | TGTCAGGAGGATTCTGTTGTGGGA |
| Orca3-reverse | CGCATATTAAACGCGGCTGCATCA |

\*Also used in 5'RACE.

## **Monitoring *ZCT1* expression in HRs using qRT-PCR**

To determine endogenous response levels, WT hairy roots were treated with some chosen hormone concentrations for 7 h, flash-frozen, and qRT-PCR analysis of *ZCT1* expression was performed as described below.

Stable WT hairy roots treated with hormones were harvested and ground in liquid nitrogen, and mRNA was extracted using the RNazol®RT method. cDNA was synthesized from the mRNA using the SuperScript First-Strand Synthesis System for RT-PCR (Invitrogen) as previously described (Goklany, Loring, Glick, & Lee-Parsons, 2009). *ZCT1* expression levels were monitored using the primers listed in Supplementary Table 1. qRT-PCR was performed using the RT<sup>2</sup> Real-Time™ SYBR Green PCR master mix (SABiosciences) and the Bio-Rad iQ5 Real-Time PCR using the thermocycler protocol as previously described (Goklany et al., 2009). *Rps9* was used as the housekeeping gene (Collu et al., 2001; Menke, Champion, Kijne, & Memelink, 1999; Van der Fits & Memelink, 2000). The fold increase for *ZCT1* was calculated using the  $\Delta\Delta C_t$  method relative to untreated WT hairy roots, denoted with a fold change of 1.0 (Livak & Schmittgen, 2001).



## References

- Collu, G., Unver, N., Peltenburg-Looman, A. M. G., Van der Heijden, R., Verpoorte, R., & Memelink, J. (2001). Geraniol 10-hydroxylase, a cytochrome P450 enzyme involved in terpenoid indole alkaloid biosynthesis. *FEBS Letters*, *508*(2), 215–220.  
[https://doi.org/10.1016/S0014-5793\(01\)03045-9](https://doi.org/10.1016/S0014-5793(01)03045-9)
- Engler, C., Youles, M., Gruetzner, R., Ehnert, T. M., Werner, S., Jones, J. D. G., ... Marillonnet, S. (2014). A Golden Gate modular cloning toolbox for plants. *ACS Synthetic Biology*, *3*(11), 839–843. <https://doi.org/10.1021/sb4001504>
- Goklany, S., Loring, R. H., Glick, J., & Lee-Parsons, C. W. T. (2009). Assessing the limitations to terpenoid indole alkaloid biosynthesis in *Catharanthus roseus* hairy root cultures through gene expression profiling and precursor feeding. *Biotechnology Progress*, *25*(5), 1289–1296. <https://doi.org/10.1002/btpr.204>
- Livak, K. J., & Schmittgen, T. D. (2001). Analysis of relative gene expression data using real-time quantitative PCR and the  $2^{-\Delta\Delta CT}$  method. *Methods*, *25*(4), 402–408.  
<https://doi.org/10.1006/meth.2001.1262>
- Menke, F. L. H., Champion, A., Kijne, J. W., & Memelink, J. (1999). A novel jasmonate- and elicitor- responsive element in the periwinkle secondary metabolite biosynthetic gene *Str* interacts with a jasmonate- and elicitor- inducible AP2- domain transcription factor, *ORCA2*. *The EMBO Journal*, *18*(16), 4455–4463.  
<https://doi.org/10.1093/emboj/18.16.4455>
- Mortensen, S., Bernal-Franco, D., Cole, L. F., Sathitloetsakun, S., Cram, E. J., & Lee-Parsons, C. W. T. (2019). EASI Transformation: An Efficient Transient Expression Method for Analyzing Gene Function in *Catharanthus roseus* Seedlings. *Frontiers in Plant Science*,

10(June), 1–17. <https://doi.org/10.3389/fpls.2019.00755>

Van der Fits, L., & Memelink, J. (2000). ORCA3, a Jasmonate-Responsive Transcriptional Regulator of Plant Primary and Secondary Metabolism. *Science*, 295(July), 295–297. <https://doi.org/10.1126/science.289.5477.295>

Weber, E., Engler, C., Gruetzner, R., Werner, S., & Marillonnet, S. (2011). A modular cloning system for standardized assembly of multigene constructs. *PLoS ONE*, 6(2). <https://doi.org/10.1371/journal.pone.0016765>
